# Supplementary material for: First Correction by Prime Editing of a Mutation in the RYR1 Gene Responsible for a Myopathy
Source: Preprints.org preprint supplement (doi:10.20944/preprints202311.1585.v1), 2023-11-24
Supplement: Supplementary file 1 [file supplementary]

## Sheet: Table S1
	Table S1. Spacer, PBS, RTT and nsgRNA sequence.
	epegRNA	Spacer	PBS	RTT	nsgRNA
	1	gAGGTGGGGGCTGGGTCCTTA	GGACCCAGCC	AACACTCCGTAA	GTACATCACGGAGCAGCCTG
	2	gAGGTGGGGGCTGGGTCCTTA	GGACCCAGCC	TCAACACTCCGTAA	GTACATCACGGAGCAGCCTG
	3	gAGGTGGGGGCTGGGTCCTTA	GGACCCAGCC	GCTCAACACTCCGTAA	GTACATCACGGAGCAGCCTG
	4	gAGGTGGGGGCTGGGTCCTTA	GGACCCAGCCCCC	AACACTCCGTAA	GTACATCACGGAGCAGCCTG
	5	gAGGTGGGGGCTGGGTCCTTA	GGACCCAGCCCCC	TCAACACTCCGTAA	GTACATCACGGAGCAGCCTG
	6	gAGGTGGGGGCTGGGTCCTTA	GGACCCAGCCCCC	GCTCAACACTCCGTAA	GTACATCACGGAGCAGCCTG
	7	gAGGTGGGGGCTGGGTCCTTA	GGACCCAGCCCCCACC	AACACTCCGTAA	GTACATCACGGAGCAGCCTG
	8	gAGGTGGGGGCTGGGTCCTTA	GGACCCAGCCCCCACC	TCAACACTCCGTAA	GTACATCACGGAGCAGCCTG
	9	gAGGTGGGGGCTGGGTCCTTA	GGACCCAGCCCCCACC	GCTCAACACTCCGTAA	GTACATCACGGAGCAGCCTG
	3C	gAGGTGGGGGCTGGGTCCTTA	GGACCCAGCC	GCTCAATACTCCGTGC	GTACATCACGGAGCAGCCTG
	3D	gAGGTGGGGGCTGGGTCCTTA	GGACCCAGCC	GCTCAATACGCCGTGC	GTACATCACGGAGCAGCCTG
	3E	gAGGTGGGGGCTGGGTCCTTA	GGACCCAGCC	GCTCAACACTCCGTGC	GTACATCACGGAGCAGCCTG
	3G	gAGGTGGGGGCTGGGTCCTTA	GGACCCAGCC	GCTCAATACTCCGTGA	GTACATCACGGAGCAGCCTG
	10-19	gAGGTGGGGGCTGGGTCCTTA	GGACCCAGCC	GGTGCTCAACACTCCGTAA	GTACATCACGGAGCAGCCTG
	10-22	gAGGTGGGGGCTGGGTCCTTA	GGACCCAGCC	ACTGGTGCTCAACACTCCGTAA	GTACATCACGGAGCAGCCTG
	10-26	gAGGTGGGGGCTGGGTCCTTA	GGACCCAGCC	ACCGACTGGTGCTCAACACTCCGTAA	GTACATCACGGAGCAGCCTG
	10-28	gAGGTGGGGGCTGGGTCCTTA	GGACCCAGCC	GGACCGACTGGTGCTCAACACTCCGTAA	GTACATCACGGAGCAGCCTG
	10-31	gAGGTGGGGGCTGGGTCCTTA	GGACCCAGCC	GTGGGACCGACTGGTGCTCAACACTCCGTAA	GTACATCACGGAGCAGCCTG
	10-35	gAGGTGGGGGCTGGGTCCTTA	GGACCCAGCC	GGCAGTGGGACCGACTGGTGCTCAACACTCCGTAA	GTACATCACGGAGCAGCCTG
	3mut	gAGGTGGGGGCTGGGTCCTTA	GGACCCAGCC	GCTCAACATGCCGTAA	None
