# Supplementary material for: First Correction by Prime Editing of a Mutation in the RYR1 Gene Responsible for a Myopathy
Source: Preprints.org preprint supplement (doi:10.20944/preprints202311.1585.v1), 2023-11-24
Supplement: Supplementary file 3 [file Table S2.xlsx]

## Sheet: Table S2
	Table S2. Primer sequences
	Primer	Sequence (5'-3')
	PCR amplication on ADNg F	TTTCTACCCTTATCACTGGGAAAG
	PCR amplication on ADNg R	GTGAAATCCCGTCTCTACTAAAAG
	Primer Sanger sequencing	CTATCCAGgtgcccctggta
	Deepseq_F	atctttaagcgggagaaggagctg
	Deepseq_R	TCTCAAACTCCTGACCTCGTGATC
	PCRforPEamplication_F	cttatcgaaattaatacgactcactatagggataatCTCCCGGGCTGGCAGCAGGGCCCCAGCGagagccgccaccatgaaacg
	PCRforPEamplication_R	ttttttttttttttttttttttttttttttttttttttttttttttttttttttttttttttttttttttttttttttttttttttttttttttttttttttttttttttttttttttttgaaaggacagtgggagtggcacc
